# Supplementary material for: Disabling Cas9 by an anti-CRISPR DNA mimic
Source: PubMed Central journal article supplement — Sci Adv. 2017 Jul 12;3(7):e1701620. doi: 10.1126/sciadv.1701620 (PMC5507636; doi:10.1126/sciadv.1701620), 2017-07-12
Supplement: 1701620_SM.pdf [file 1701620_SM.pdf]

## Supplementary Materials for

### Disabling Cas9 by an anti-CRISPR DNA mimic

Jiyung Shin, Fuguo Jiang, Jun-Jie Liu, Nicolas L. Bray, Benjamin J. Rauch, Seung Hyun Baik, Eva Nogales, Joseph Bondy-Denomy, Jacob E. Corn, Jennifer A. Doudna

Published 12 July 2017, *Sci. Adv.* **3**, e1701620 (2017)

DOI: 10.1126/sciadv.1701620

#### The PDF file includes:

- fig. S1. Gel filtration of Cas9 complexes with AcrIIA4.
- fig. S2. Exposed region analysis of SpyCas9 at AcrIIA4-free and AcrIIA4-bound states.
- fig. S3. Cryo-EM of Cas9 ribonucleoprotein particles.
- fig. S4. Classification and refinement workflow.
- fig. S5. Atomic modeling.
- fig. S6. Model comparison between AcrIIA4-bound and DNA-bound SpyCas9-sgRNA complexes.
- fig. S7. Biological replicate data for BLI data shown in Fig. 3C.
- fig. S8. EMSA of increasing concentrations of Cas9 binding to sgRNA in the absence or presence of AcrIIA4.
- fig. S9. EMSA of Cas9-sgRNA binding to a target DNA with and without AcrIIA4.
- fig. S10. Representative flow cytometry data used to create Fig. 4A.
- fig. S11. Western blot of AcrIIA4-3XFLAG expression.
- fig. S12. Representative flow cytometry data used to create the graph shown in Fig. 4B.
- fig. S13. Representative flow cytometry data used to create the graph shown in Fig. 4C.
- fig. S14. Quantification of on- and off-target editing at HBB, as measured by TIDE analysis.
- table S1. Data collection and model refinement statistics.
- table S2. Oligonucleotides used in this study.

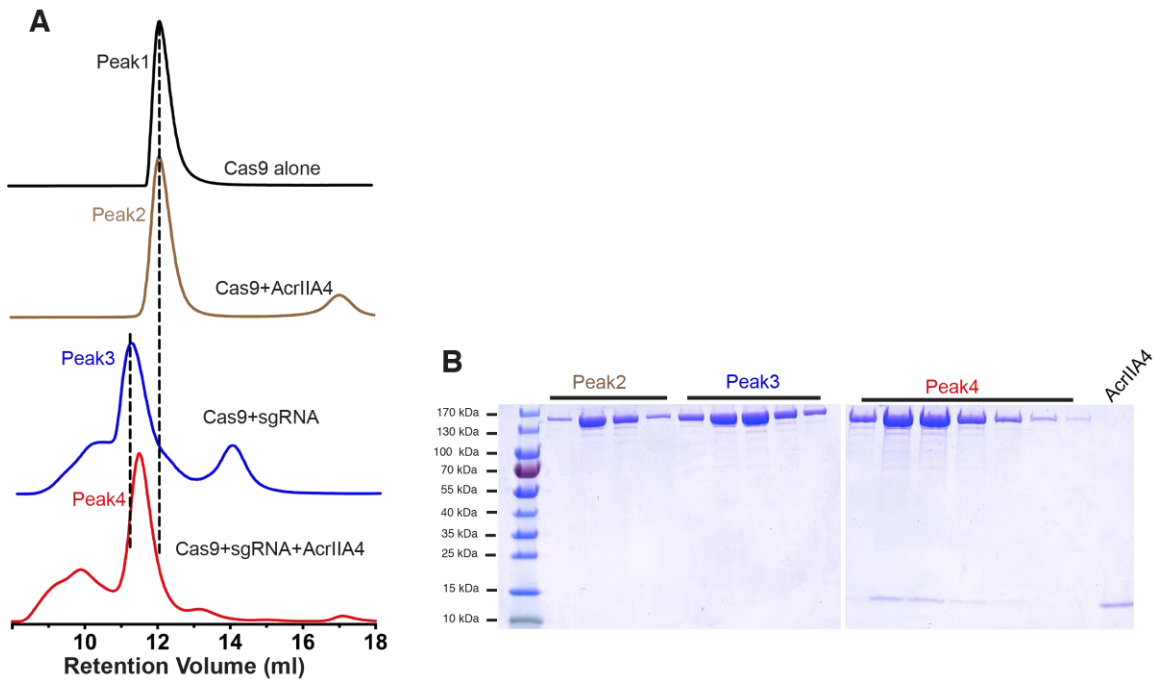

**fig. S1. Gel filtration of Cas9 complexes with AcrIIA4.** The size-exclusion chromatograph of Cas9 only (black), Cas9 with AcrIIA4 (brown), Cas9-sgRNA complex and Cas9-sgRNA-AcrIIA4 complex were aligned together based on the retention volume from the Superdex200 column (GE Healthcare). The peaks were marked with dashed lines. **(B)**. SDS-PAGE analysis of the fractions corresponding to major peaks in the panel **(A)**.

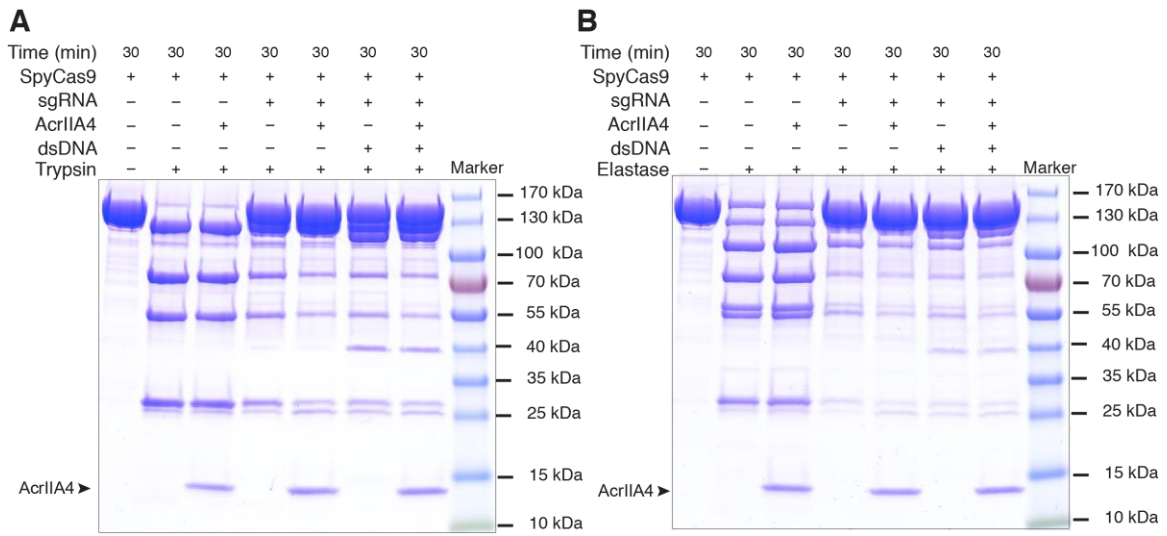

**fig. S2. Exposed region analysis of SpyCas9 at AcrIIA4-free and AcrIIA4-bound states.** Limited proteolysis of AcrIIA4-free and AcrIIA4-bound Cas9 by trypsin (**A**) and elastase (**B**) for 30 min. Undigested protein served as the zero time point.

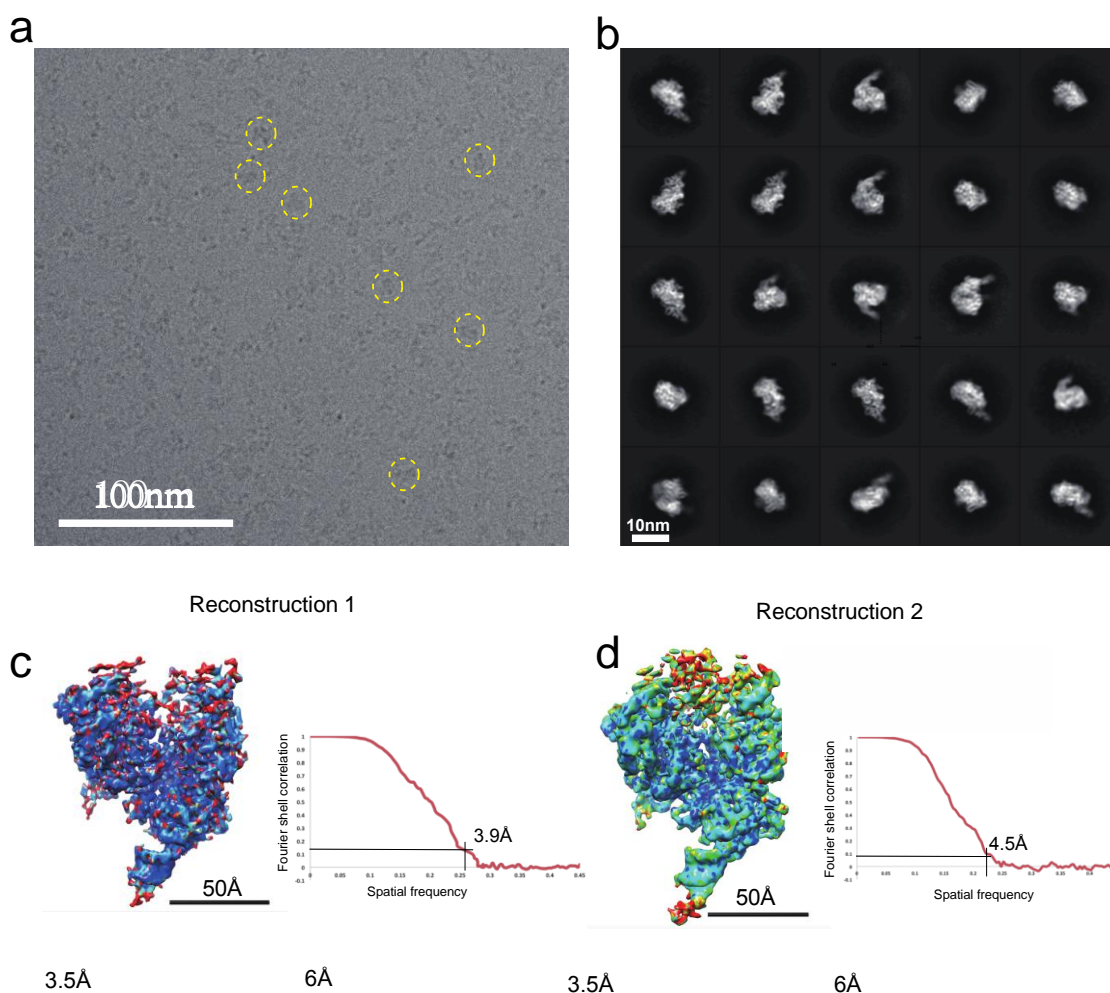

**fig. S3. Cryo-EM of Cas9 ribonucleoprotein particles.** (a) Example of a drift-corrected cryo-EM micrograph of SpyCas9-gRNA-AcrIIA4. Some representative particles are circled in yellow. (b) Reference-free 2D class averages showing Cas9 clam-like particles. (c) Cryo-EM structure of the SpyCas9-gRNA-AcrIIA4 used for model building shown colored by local resolution (the HNH domain is blurred out due to flexibility). Resolution ranges from 3.5 Å to 5.5 Å. The right panel shows the Fourier shell correlation (FSC) curve calculated using two independent half maps, indicating an overall resolution of 3.9Å (based on the 0.143 FSC criterion) (d) Cryo-EM structure of the SpyCas9-gRNA-AcrIIA4 obtained by sub-classification and showing a visible HNH domain (see EM\_S2 figure for details), colored by local resolution ranges from 4 Å to 6 Å. Right panel, FSC curve indicating an overall resolution 4.5Å.

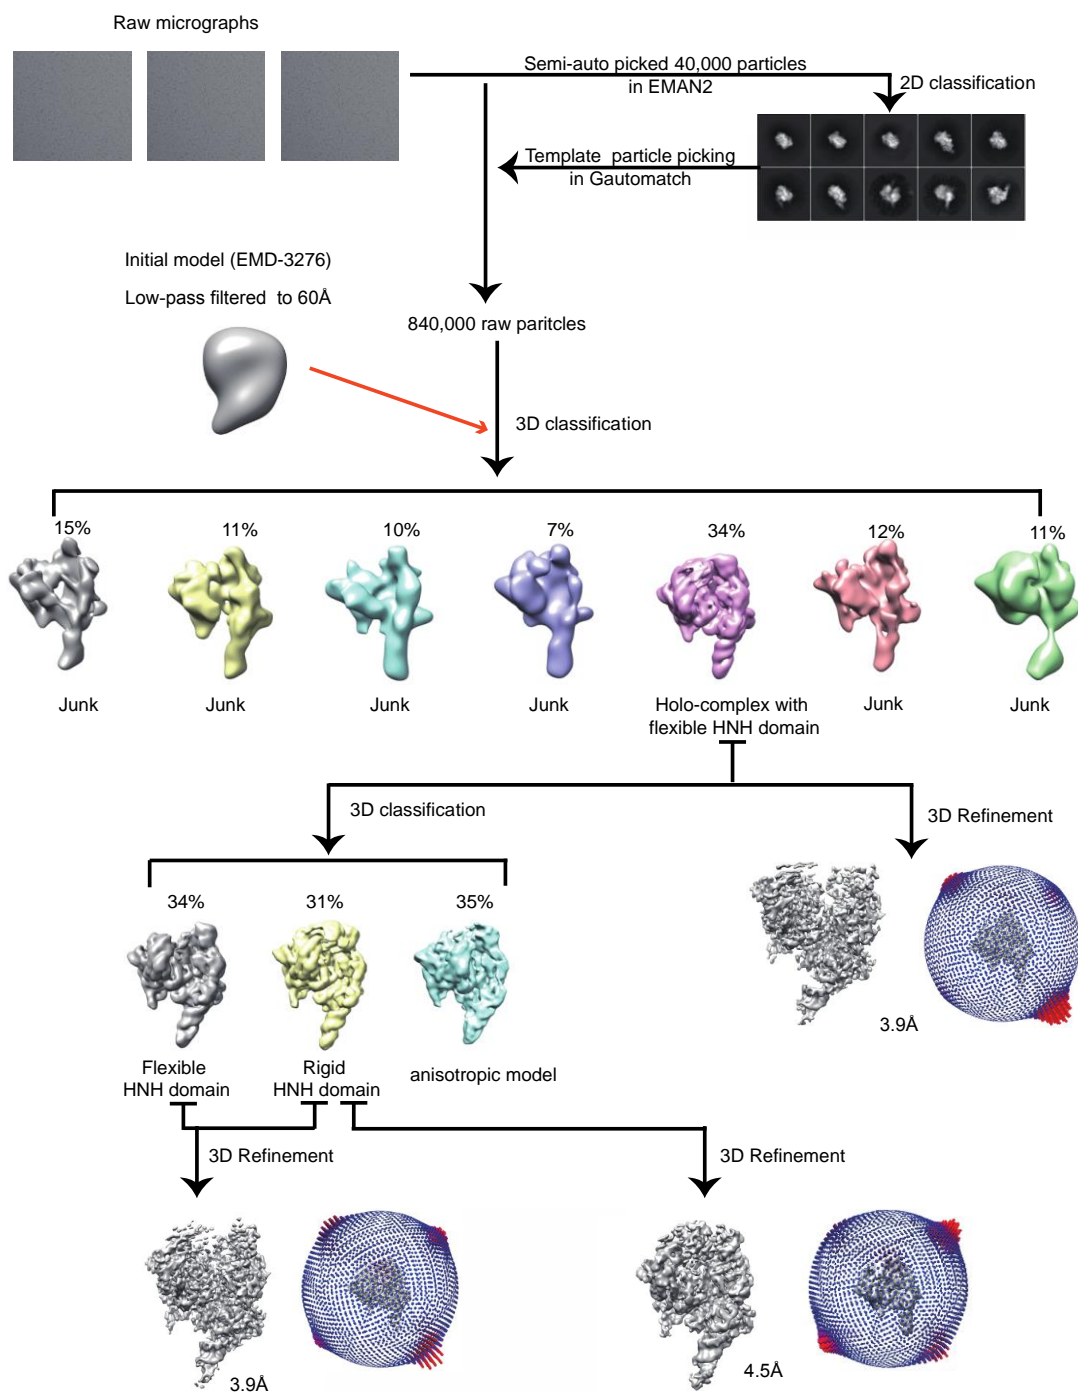

**fig. S4. Classification and refinement workflow.** A small stack of ~40,000 particles was subjected to 2D reference-free alignment. The resulting 2D class-averages were then used as templates for automatic particle picking. A total dataset of ~840,000 particles were ultimately picked for 3D classification into 7 classes, with our previous cryo-EM

Cas9 structure (EMD-3276) low-pass filtered to 60 Å used as a reference. The class with the most particles (~34%) was subsequently refined to 3.9Å resolution (reconstruction 1). To further improve the density of the HNH domain, which appears highly flexible, particles were subjected to further 3D classification using 3 classes. One of the subclasses, containing a strong HNH density was further refined and produced a structure at 4.5Å (reconstruction 2). 3D refinement by combining first and second subclasses produced a structure at 3.9 Å that was used for atomic modeling of the AcrIIA4.

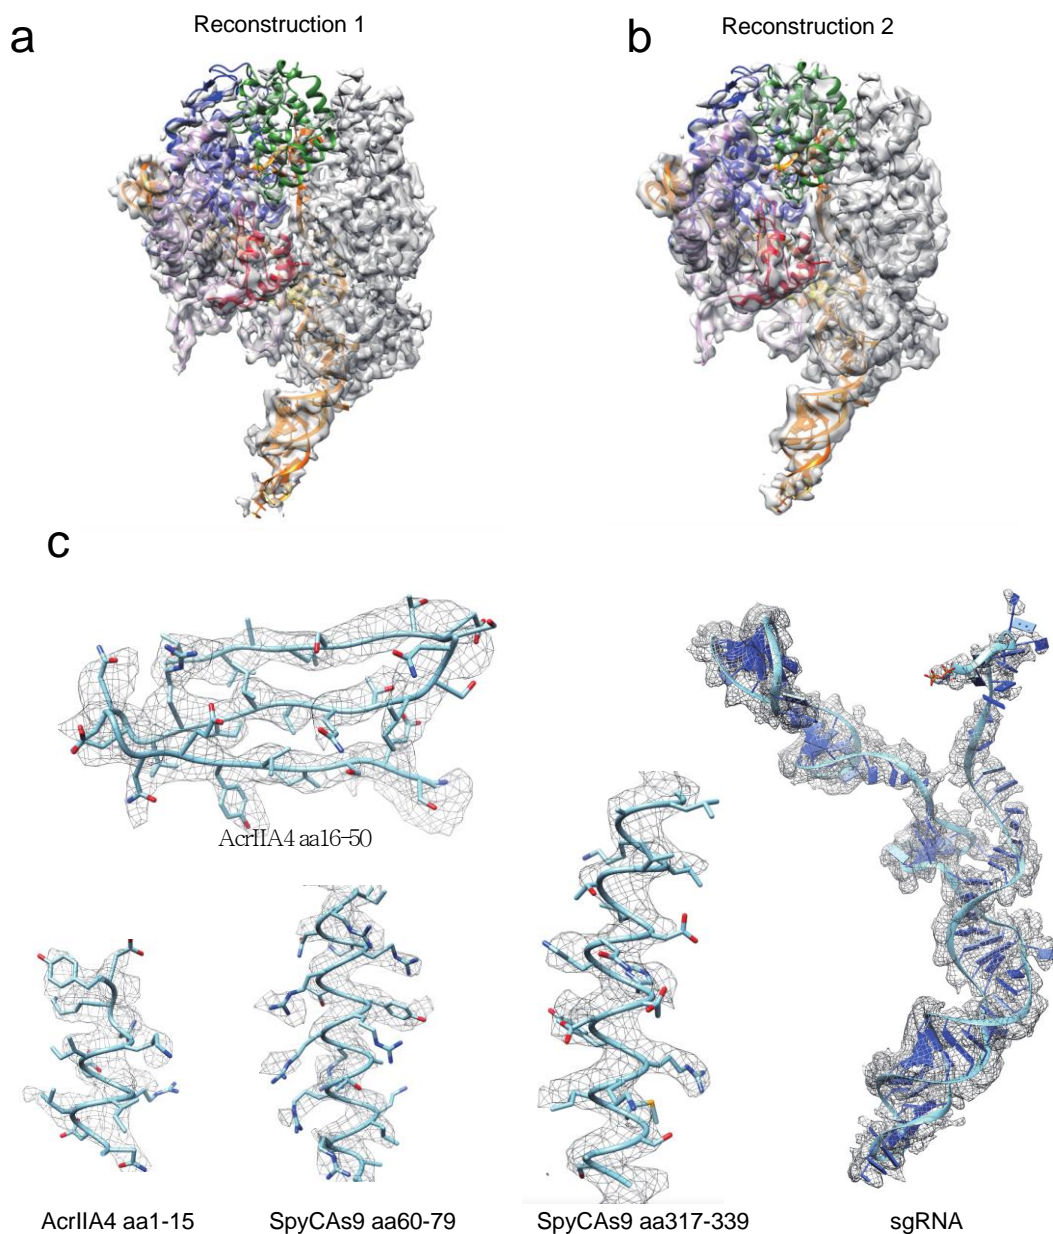

**fig. S5. Atomic modeling.** (a) Color coded atomic model of SpyCas9-sRNA-AcrIIA4 shown within the cryo-EM density of reconstruction 1 (3.9 Å resolution) (a) and reconstruction 2 (4.5 Å resolution) (b). The color scheme is the same as Figure 2. The map in (b) has better defined density for the HNH domain corresponding to the green ribbon. (c) Representative regions of the EM density map of SpyCas9-sRNA-AcrIIA4 (reconstruction 1), into which the atomic model was built. The subunit and sequence are marked under the corresponding regions.



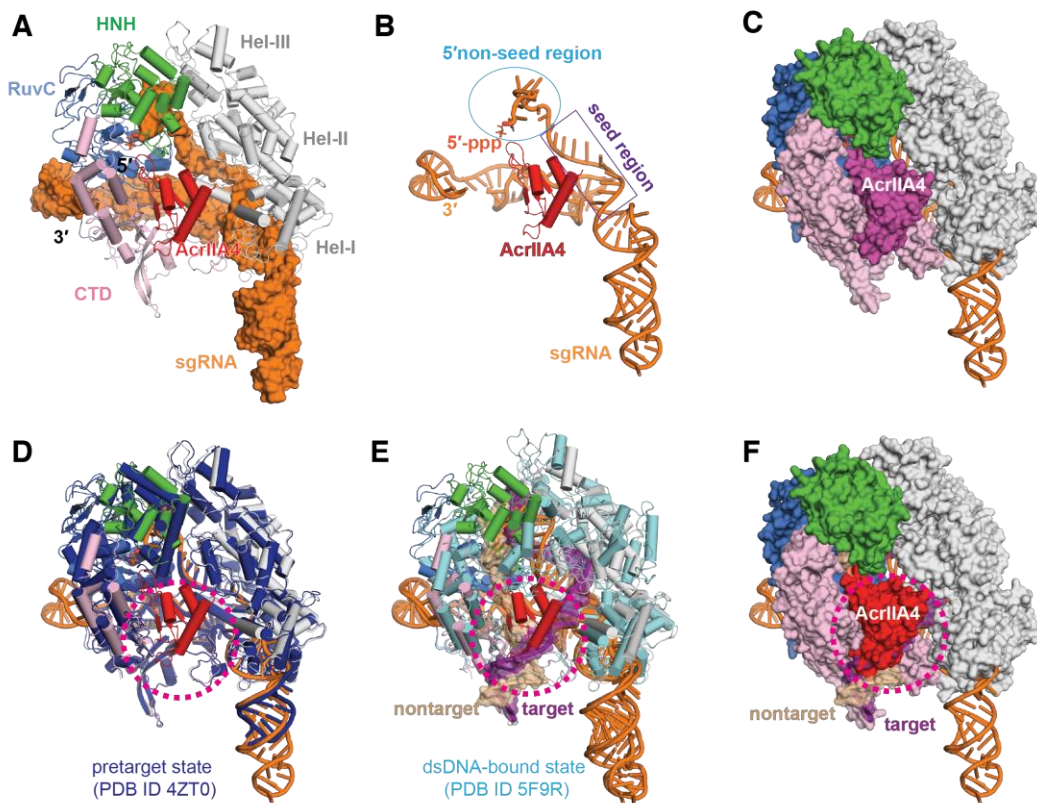

**fig. S6. Model comparison between AcrIIA4-bound and DNA-bound SpyCas9-sgRNA complexes.** (A) Atomic model of Spycas9-sgRNA-AcrIIA4. Domains were color as the same scheme in Fig2. The sgRNA is shown as surface representation and Cas9-AcrIIA4 is shown in ribbon diagram. (B) The model for AcrIIA4 and sgRNA were subtracted from the holo-model and shown independently. The seed-region and non-seed region are highlighted in the model. (C) The surface representation of Cas9 complexed with AcrIIA4. (D) The published atomic model for Cas9-sgRNA (PDB 4ZT0, colored by deep blue) was aligned with Cas9-sgRNA-AcrIIA4 model. (E) The published atomic model for dsDNA bound Cas9-sgRNA (PDB 5F9R, colored cyan for Cas9, orange for sgRNA, purple for target DNA strand and beige for nontarget strand) was aligned with Cas9-sgRNA-AcrIIA4 atomic model. Pink dash-lined circle represents the position of PAM-recognition cleft. (F) The published atomic model for dsDNA bound Cas9-sgRNA (PDB 5F9R) was aligned with the surface density of Cas9-sgRNA-AcrIIA4 atomic model. For clarity, only both DNA strand are shown with Cas9-sgRNA from 5F9R omitted. AcrIIA4 completely blocks PAM recognition cleft.



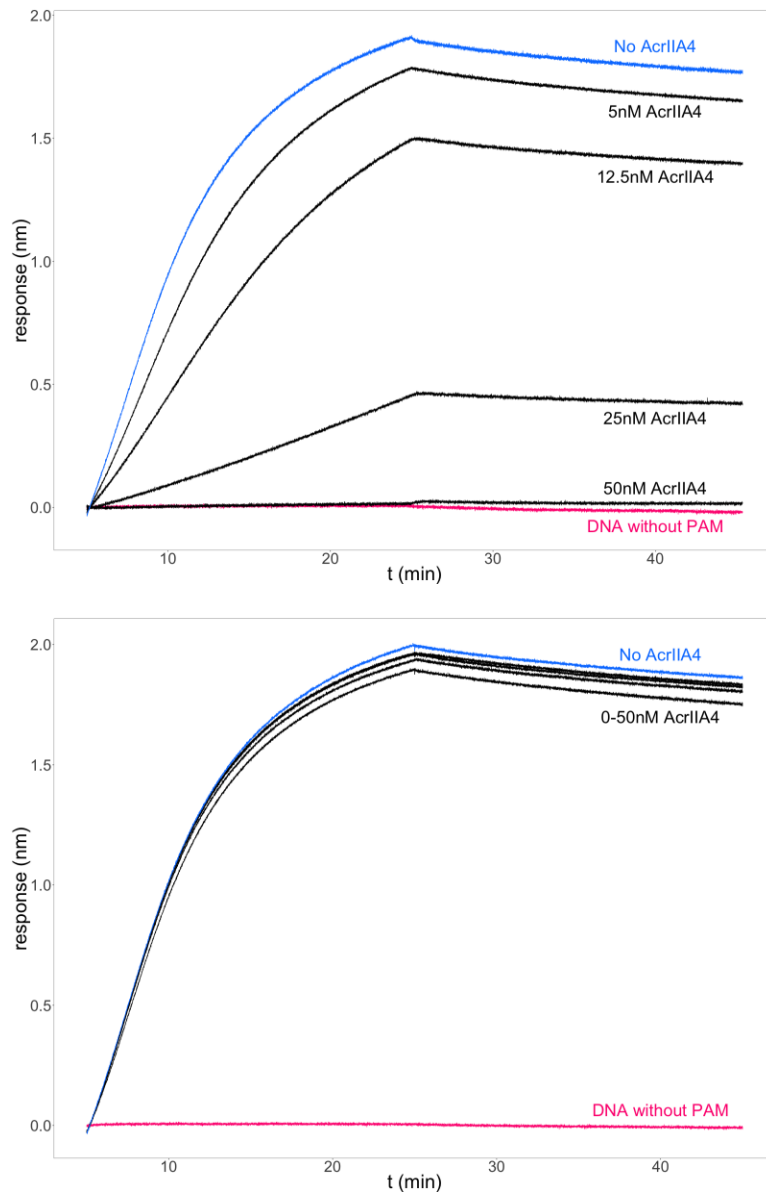

**fig. S7. Biological replicate data for BLI data shown in Fig. 3C.** (Top) Pre-incubation of dCas9-sgRNA with AcrIIA4 inhibits DNA binding. (Bottom) Addition of AcrIIA4 after allowing dCas9-sgRNA to bind DNA.

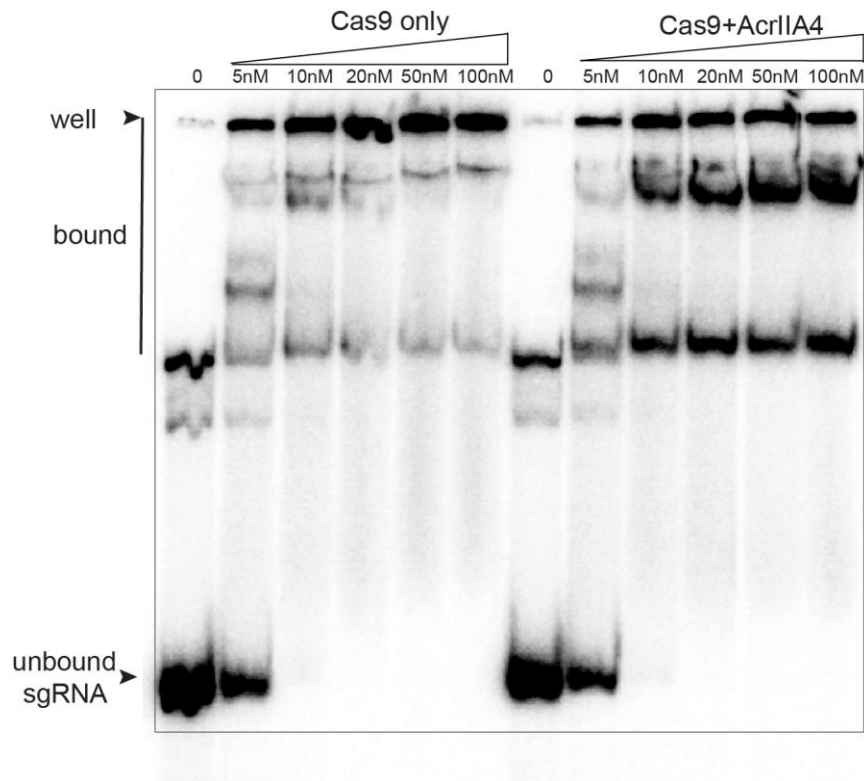

**fig. S8. EMSA of increasing concentrations of Cas9 binding to sgRNA in the absence or presence of AcrIIA4. AcrIIA4 does not block sgRNA binding.**

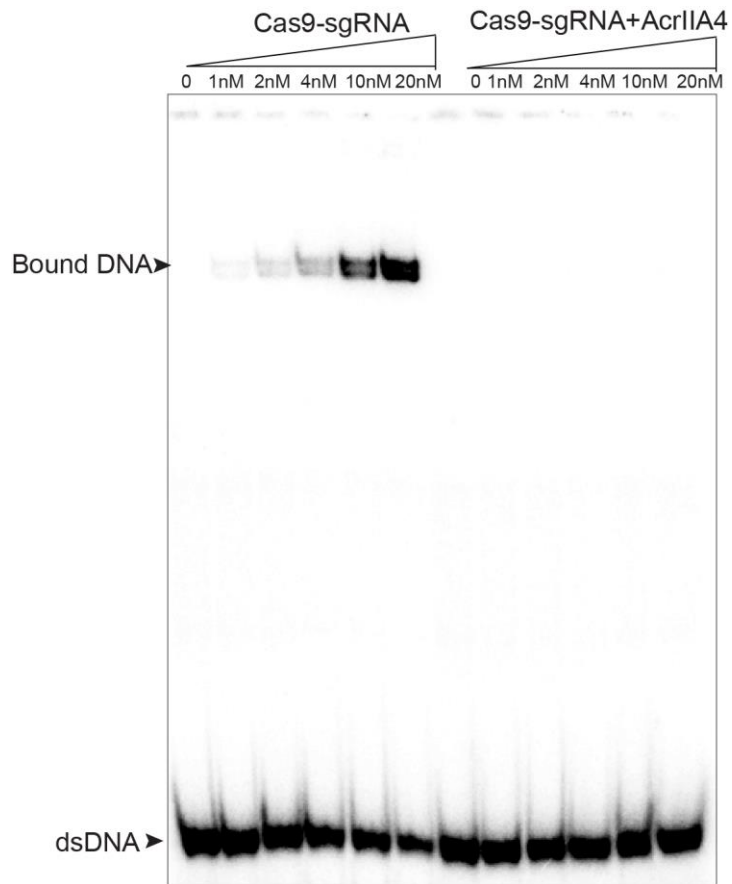

**fig. S9. EMSA of Cas9-sgRNA binding to a target DNA with and without AcrIIA4.**  
The AcrIIA4 inhibitor prevents Cas9-sgRNA binding to target DNA.

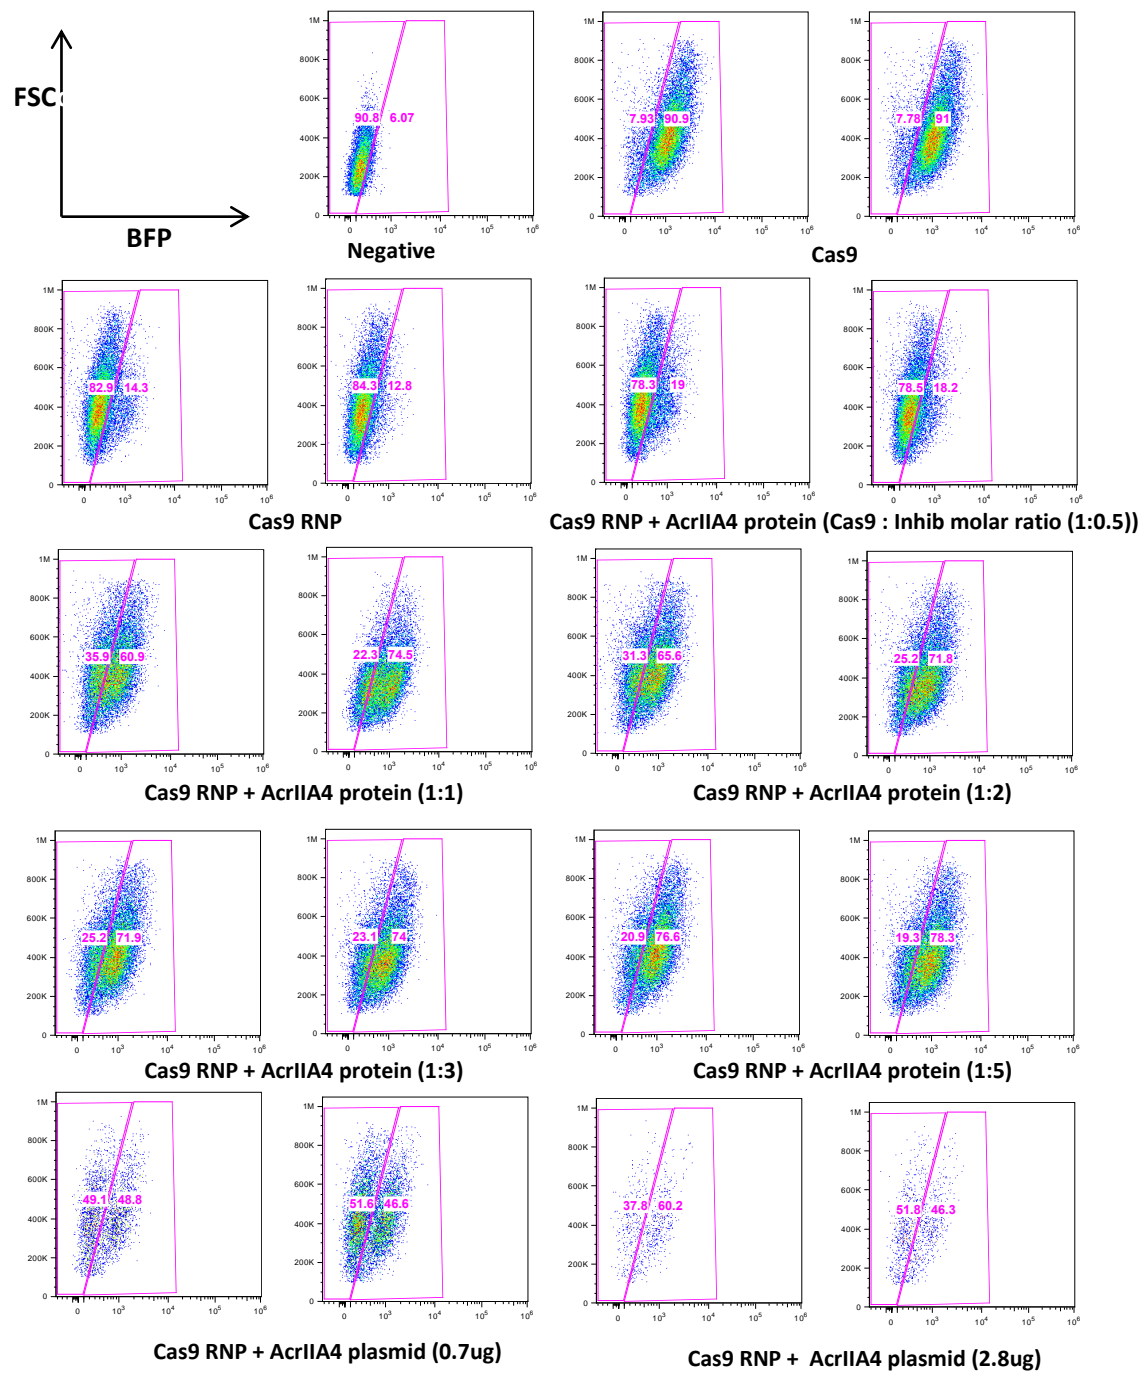

fig. S10. Representative flow cytometry data used to create Fig. 4A.

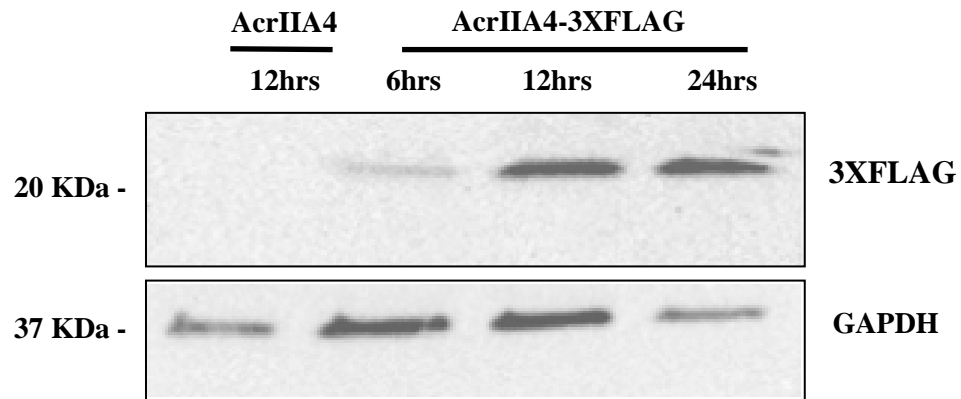

**fig. S11. Western blot of AcrIIA4-3XFLAG expression.** The expression level of AcrIIA4-3XFLAG was determined by Western blot 6,12,and 24 hours after plasmid nucleofection. Glyceraldehyde 3-phosphate dehydrogenase (GAPDH) was used as a loading control.

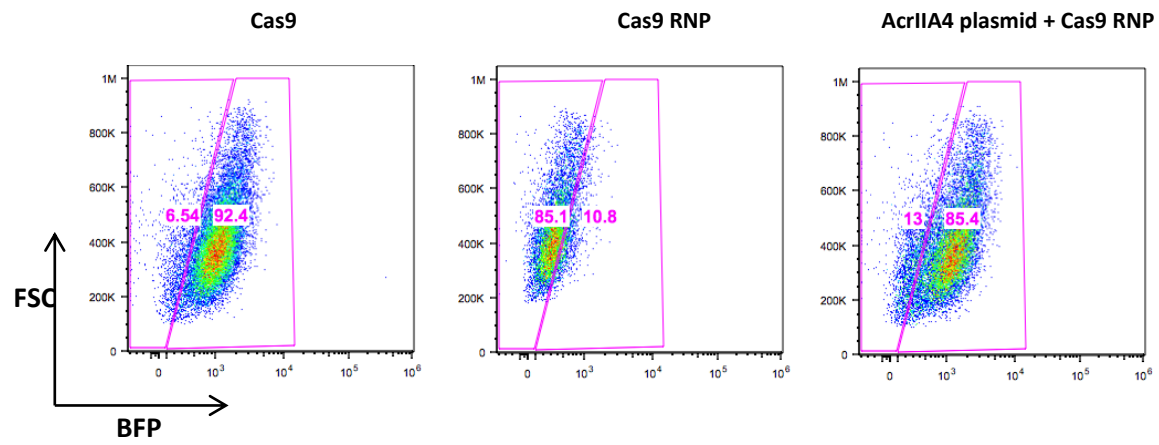

**fig. S12. Representative flow cytometry data used to create the graph shown in Fig. 4B.**



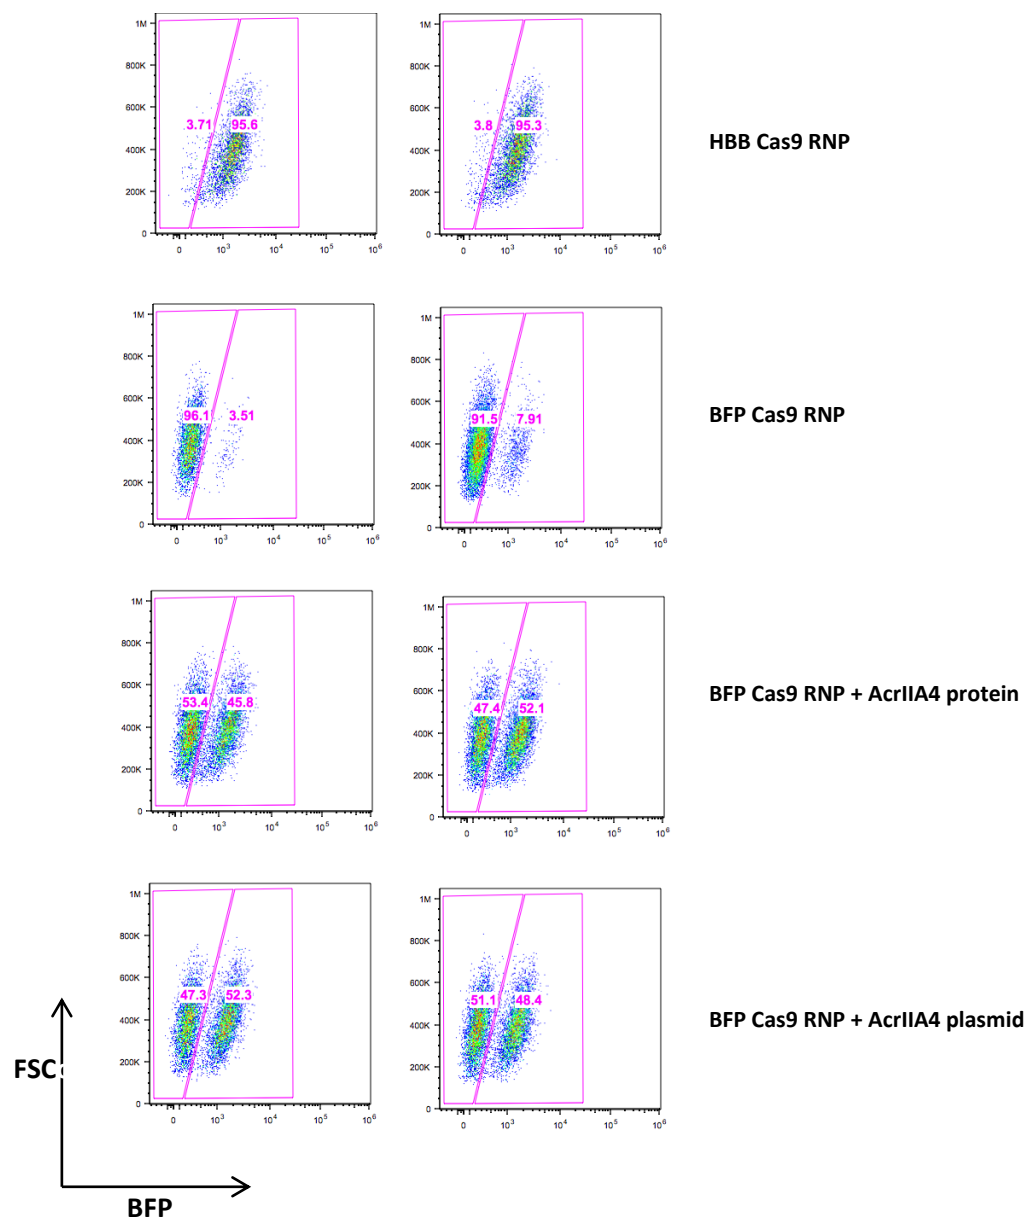

**fig. S13. Representative flow cytometry data used to create the graph shown in Fig. 4C.**

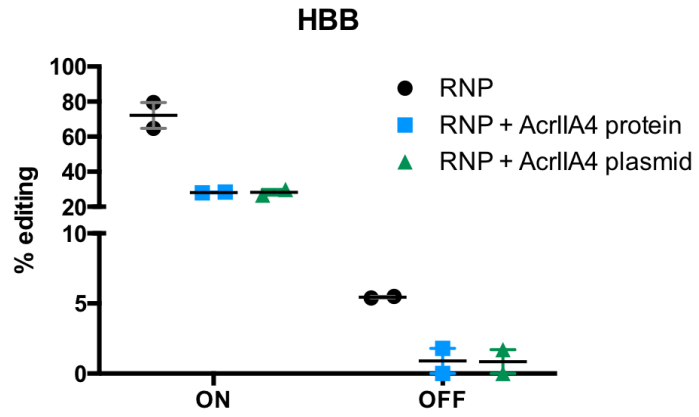

**fig. S14. Quantification of on- and off-target editing at HBB, as measured by TIDE analysis.**

**table S1. Data collection and model refinement statistics.**

---

| <b>Data collection and model refinement statistics of SpyCas9-sgRNA-AcrIIA4</b> |                                    |
|---------------------------------------------------------------------------------|------------------------------------|
| <b>Data Collection</b>                                                          |                                    |
| EM                                                                              | Titan Krios 300kV, K2 Gatan Summit |
| Pixel size (Å)                                                                  | 1.04                               |
| Defocus range (µm)                                                              | -1.5 to -3.0                       |
| <b>Reconstruction (Relion)</b>                                                  |                                    |
| Relion2.0                                                                       |                                    |
| Accuracy of rotations (°)                                                       | 2.485                              |
| Accuracy of transitions (pixel)                                                 | 1.310                              |
| Final resolution (Å)                                                            | 3.9                                |
| <b>Refinement (Phenix)</b>                                                      |                                    |
| Map CC (whole unit cell)                                                        | 0.895                              |
| Map CC (around atoms)                                                           | 0.829                              |
| <b>R.m.s. deviations</b>                                                        |                                    |
| Bond lengths (Å)                                                                | 0.01                               |
| Bond angles (°)                                                                 | 1                                  |
| <b>Ramachandran plot</b>                                                        |                                    |
| % favoured                                                                      | 91.91                              |
| %allowed                                                                        | 8.09                               |
| % outliers                                                                      | 0.00                               |
| <b>Molprobit</b>                                                                |                                    |
| Clashscore                                                                      | 2.5                                |

---

**table S2. Oligonucleotides used in this study.**

| Type                                                                                                   | Name                                  | Sequence                                                                                           |
|--------------------------------------------------------------------------------------------------------|---------------------------------------|----------------------------------------------------------------------------------------------------|
| Oligos used for testing inhibition of SpyCas9 activity with radiolabeled target DNA                    | Alt-R crRNA                           | /AltR1/rGrA rCrCrC rCrCrU rCrCrA rCrCrC rCrGrC rCrUrC rGrUrU rUrUrA rGrArG rCrUrA rUrGrC rU/AltR2/ |
|                                                                                                        | Alt-R tracrRNA                        | IDT 1072532                                                                                        |
|                                                                                                        | target DNA (complementary strand)     | GGT ATG AGG TTT ATT CTT TCC TGA GGC GGG GTG GGG GGG AAT TGC TTT CTG TTT TGT TAA                    |
|                                                                                                        | target DNA (non-complementary strand) | TTA ACA AAA CAG AAA GCA ATT CCC CCC CAC CCC GCC TCA GGA AAG AAT AAA CCT CAT ACC                    |
| Oligos used in BLI assay                                                                               | target                                | /5Biosg/agcagaaatctctgctGACGCATAAAGATGAG ACGCTGGagtacaaacgtcagct                                   |
|                                                                                                        | target_rc                             | agctgacgtttgtactCCAGCGTCTCATCTTTATGCGT Cagcagagatttctgct                                           |
|                                                                                                        | target-PAM                            | /5Biosg/agcagaaatctctgctGACGCATAAAGATGAG ACGCTCGagtacaaacgtcagct                                   |
|                                                                                                        | target-PAM_rc                         | agctgacgtttgtactCCAGCGTCTCATCTTTATGCGT Cagcagagatttctgct                                           |
|                                                                                                        | FwdVar oligo                          | ggatcctaatac gactcactataGACGCATAAAGATGAGA CGCgttttagagctagaaatagc                                  |
| Assembly of T7 polymerase substrates for sgRNA synthesis by in vitro transcription (UPPERCASE = guide) | FwdVar-HBB                            | ggatcctaatac gactcactatagCTTGCCCCA CAGGGCAGTAAgttttagagctagaa                                      |
|                                                                                                        | FwdVar-VEGFAs2                        | ggatcctaatac gactcactatagGACCCCCTCCACCCCGC CTCgttttagagctagaa                                      |
|                                                                                                        | T7RevLong                             | AAAAAAGCACCGACTCGGTGCCACTTTTTCA AGTTGATAACGGACTAGCCTTATTTAACTTG CTA TTTCTAGCTCTAAAAC               |
|                                                                                                        | T7FwdAmp                              | GGATCCTAATACGACTCACTATAG                                                                           |
|                                                                                                        | T7RevAmp                              | AAAAAAGCACCGACTCGG                                                                                 |
| Primers for cloning 3X-FLAG AcrIIA4                                                                    | RB_AcrIIA 4 Fwd 1                     | AACATTAACGACCTCATACG                                                                               |
|                                                                                                        | RB_AcrIIA 4 RV1                       | G TTCAGTTC ACTTTTCAACG                                                                             |
|                                                                                                        | RB_AcrIIA                             | CGAGCTCGGATCCGCCACCATGAAC                                                                          |

|                                                                            |                                       |                                                                                                                   |
|----------------------------------------------------------------------------|---------------------------------------|-------------------------------------------------------------------------------------------------------------------|
|                                                                            | 4 Fwd3                                |                                                                                                                   |
|                                                                            | RB_AcrIIA<br>4 RV3<br>3XFLAG          | ATATCTGCAGAATTCTTATCACTTGTCGTCGT<br>CGTCCTTGTAGTCGATGTCGTGGTCCTTGTA<br>GTCACCGTCGTGGTCCTTGTAGTCGTTCA<br>TTCACCTTT |
| Primers for<br>T7E1 and<br>TIDE analysis                                   | HBB on-<br>target F1                  | TCACTTAGACCTCACCTGTG                                                                                              |
|                                                                            | HBB on-<br>target R1                  | TATGGGACGCTTGATGTTTTCT                                                                                            |
|                                                                            | HBB off-<br>target F1                 | TGGATAGGAAAGGTGAAGT                                                                                               |
|                                                                            | HBB off-<br>target R1                 | ATATTTGAGAGCCACCGC                                                                                                |
| Primers for<br>Next<br>Generation<br>Amplicon<br>Sequencing<br>(First PCR) | HBB<br>stubbed on-<br>target F        | GCTCTTCCGATCTactgtgttcactagcaacctcaa                                                                              |
|                                                                            | HBB<br>stubbed on-<br>target R        | GCTCTTCCGATCTtgggaaaatagaccaataggcagag                                                                            |
|                                                                            | HBB<br>stubbed off-<br>target F       | GCTCTTCCGATCTtaccctttcccgttctccac                                                                                 |
|                                                                            | HBB off-<br>target with<br>stub R     | GCTCTTCCGATCTggtacggcctaagaaattatagtta                                                                            |
|                                                                            | VEGFAs2<br>stubbed on-<br>target F1   | GCTCTTCCGATCTcgacaggggcaaagtgagtgacc                                                                              |
|                                                                            | VEGFAs2<br>stubbed on-<br>target R1   | GCTCTTCCGATCTcctccgaagcgagaacagccc                                                                                |
|                                                                            | VEGFAs2<br>stubbed off-<br>target F2  | GCTCTTCCGATCTgtccaggaaccctagcccaaac                                                                               |
|                                                                            | VEGFAs2<br>stubbed off-<br>target R2  | GCTCTTCCGATCTgctctttcattcgttccatctctcg                                                                            |
|                                                                            | VEGFAs2<br>stubbed off-<br>target F15 | GCTCTTCCGATCTcaagatgtgcactgggctagc                                                                                |
|                                                                            | VEGFAs2<br>stubbed off-<br>target R15 | GCTCTTCCGATCTcgcagcctattgtctcctgg                                                                                 |
|                                                                            | VEGFAs2<br>stubbed off-<br>target F22 | GCTCTTCCGATCTgggctctggggtgactccaag                                                                                |

|                                                              |                                |                                                                      |             |          |
|--------------------------------------------------------------|--------------------------------|----------------------------------------------------------------------|-------------|----------|
|                                                              | VEGFAs2 stubbed off-target R22 | GCTCTTCCGATCTgactttcccaagcccacctccc                                  |             |          |
| Primers for Next Generation Amplicon Sequencing (Second PCR) | Forward primers                | AATGATACGGCGACCACCGAGATCTACAC[i5]ACACTCTTCCCTACACGACGCTCTTCCGATC * T |             |          |
|                                                              | Reverse primers                | CAAGCAGAAGACGGCATAACGAGAT[i7]GTGACTGGAGTTCAGACGTGTGCTCTTCCGA         |             |          |
|                                                              | Indexes used                   | i7 Index                                                             | i7_rc index | i5 Index |
|                                                              |                                | ATAGGTCC                                                             | GGACCTAT    | ACAGGCAT |
|                                                              |                                | CAGTGCTT                                                             | AAGCACTG    | ACAGGCAT |
|                                                              |                                | ACCATAGG                                                             | CCTATGGT    | ACAGGCAT |
|                                                              |                                | CAACTTGG                                                             | CCAAGTTG    | ACAGGCAT |
|                                                              |                                | GACGAACT                                                             | AGTTCGTC    | ACAGGCAT |
|                                                              |                                | TCGATGAC                                                             | GTCATCGA    | ACAGGCAT |
|                                                              |                                | CAAGTCGT                                                             | ACGACTTG    | ACAGGCAT |
|                                                              |                                | AGTTCGCA                                                             | TGCGAACT    | ACAGGCAT |
|                                                              |                                | CTGTATGC                                                             | GCATACAG    | ACAGGCAT |
|                                                              |                                | TCTAGGAG                                                             | CTCCTAGA    | ACAGGCAT |
|                                                              |                                | TGCTTGCT                                                             | AGCAAGCA    | ACAGGCAT |
|                                                              |                                | ACGAACGA                                                             | TCGTTCTG    | ACAGGCAT |
|                                                              |                                | TTCGCCAT                                                             | ATGGCGAA    | AATGGTCG |
|                                                              |                                | GAGCAATC                                                             | GATTGCTC    | AATGGTCG |
|                                                              |                                | AACACTGG                                                             | CCAGTGTT    | AATGGTCG |
|                                                              |                                | CCATGAAC                                                             | GTTCATGG    | AATGGTCG |
|                                                              |                                | ATAGTCGG                                                             | CCGACTAT    | AATGGTCG |
|                                                              |                                | GATTGTCC                                                             | GGACAATC    | AATGGTCG |
|                                                              |                                | TCCACGTT                                                             | AACGTGGA    | AATGGTCG |
|                                                              |                                | CAACTCCA                                                             | TGGAGTTG    | AATGGTCG |
|                                                              |                                | TGGTGAAG                                                             | CTTCACCA    | AATGGTCG |
|                                                              |                                | TGAGCTGT                                                             | ACAGCTCA    | AATGGTCG |
|                                                              |                                | AACCAGAG                                                             | CTCTGGTT    | AATGGTCG |
|                                                              |                                | AAGTCCTC                                                             | GAGGACTT    | AATGGTCG |
|                                                              |                                | GTTCTTCG                                                             | CGAAGAAC    | TTGCTTGG |
|                                                              |                                | ACAGTGAC                                                             | GTCAGTGT    | TTGCTTGG |
|                                                              |                                | CGCAATGT                                                             | ACATTGCG    | TTGCTTGG |
|                                                              |                                | AACCGTGT                                                             | ACACGGTT    | TTGCTTGG |
|                                                              |                                | CCGTTATG                                                             | CATAACGG    | TTGCTTGG |
|                                                              |                                | CCACAACA                                                             | TGTTGTGG    | TTGCTTGG |
|                                                              |                                | GGTACGAA                                                             | TTCGTACC    | TTGCTTGG |
|                                                              |                                | TACTGCTC                                                             | GAGCAGTA    | TTGCTTGG |
|                                                              |                                | ACCTCTTC                                                             | GAAGAGGT    | TTGCTTGG |
|                                                              |                                | TGGATGGT                                                             | ACCATCCA    | TTGCTTGG |
|                                                              |                                | CTTCACTG                                                             | CAGTGAAG    | TTGCTTGG |



|  |  |          |           |          |  |
|--|--|----------|-----------|----------|--|
|  |  | TACTAGCG | CGCTAGTA  | TTGCTTGG |  |
|  |  | CTAGCAGT | ACTGCTAG  | AGCCTATC |  |
|  |  | GAGAGTAC | GTACTCTC  | AGCCTATC |  |
|  |  | AGGTGTTG | CAACACCT  | AGCCTATC |  |
|  |  | TTACCGAC | GTCGGTAA  | AGCCTATC |  |
|  |  | ACCGACAA | TTGTCGGT  | AGCCTATC |  |
|  |  | CAACGAGT | ACTCGTTG  | AGCCTATC |  |
|  |  | AGTATGCC | GGCATACT  | AGCCTATC |  |
|  |  | TCACCTAG | CTAGGTGA  | AGCCTATC |  |
|  |  | ATCGGAGA | TCTCCGAT  | AGCCTATC |  |
|  |  | CTGTACCA | TGGTACAG  | AGCCTATC |  |
|  |  | ACAACAGC | GCTGTTGT  | AGCCTATC |  |
|  |  | GACTTGTG | CACAAGTC  | AGCCTATC |  |
|  |  | ATAGGTCC | GGACCTAT  | GGTCGTAT |  |
|  |  | CAGTGCTT | AAGCACTG  | GGTCGTAT |  |
|  |  | ACCATAGG | CCTATGGT  | GGTCGTAT |  |
|  |  | CAACTTGG | CCAAGTTG  | GGTCGTAT |  |
|  |  | GACGAACT | AGTTCGTC  | GGTCGTAT |  |
|  |  | TCGATGAC | GTCATCGA  | GGTCGTAT |  |
|  |  | CAAGTCGT | ACGACTTG  | GGTCGTAT |  |
|  |  | AGTTCGCA | TGCGAACT  | GGTCGTAT |  |
|  |  | CTGTATGC | GCATACAG  | GGTCGTAT |  |
|  |  | TCTAGGAG | CTCCTAGA  | GGTCGTAT |  |
|  |  | TGCTTGCT | AGCAAGCA  | GGTCGTAT |  |
|  |  | ACGAACGA | TCGTTTCGT | GGTCGTAT |  |
|  |  | TTCGCCAT | ATGGCGAA  | CTCCTGAA |  |
|  |  | GAGCAATC | GATTGCTC  | CTCCTGAA |  |
|  |  | AACACTGG | CCAGTGTT  | CTCCTGAA |  |
|  |  | CCATGAAC | GTTTCATGG | CTCCTGAA |  |
|  |  | ATAGTCGG | CCGACTAT  | CTCCTGAA |  |
|  |  | GATTGTCC | GGACAATC  | CTCCTGAA |  |
|  |  | TCCACGTT | AACGTGGA  | CTCCTGAA |  |
|  |  | CAACTCCA | TGGAGTTG  | CTCCTGAA |  |
|  |  | TGGTGAAG | CTTCACCA  | CTCCTGAA |  |
|  |  | TGAGCTGT | ACAGCTCA  | CTCCTGAA |  |
|  |  | AACCAGAG | CTCTGGTT  | CTCCTGAA |  |
|  |  | AAGTCCTC | GAGGACTT  | CTCCTGAA |  |
|  |  | GTTCTTCG | CGAAGAAC  | TGTTCCGT |  |
|  |  | ACAGTGAC | GTCACTGT  | TGTTCCGT |  |
|  |  | CGCAATGT | ACATTGCG  | TGTTCCGT |  |
|  |  | AACCGTGT | ACACGGTT  | TGTTCCGT |  |
|  |  | CCGTTATG | CATAACGG  | TGTTCCGT |  |
|  |  | CCACAACA | TGTTGTGG  | TGTTCCGT |  |
|  |  | GGTACGAA | TTCGTACC  | TGTTCCGT |  |
|  |  | TACTGCTC | GAGCAGTA  | TGTTCCGT |  |

|  |  |          |          |          |  |
|--|--|----------|----------|----------|--|
|  |  | ACCTCTTC | GAAGAGGT | TGTTCCGT |  |
|  |  | TGGATGGT | ACCATCCA | TGTTCCGT |  |
|  |  | CTTCACTG | CAGTGAAG | TGTTCCGT |  |
|  |  | TACTAGCG | CGCTAGTA | TGTTCCGT |  |
|  |  | CTAGCAGT | ACTGCTAG | CCACATTG |  |
|  |  | GAGAGTAC | GTACTCTC | CCACATTG |  |
|  |  | AGGTGTTG | CAACACCT | CCACATTG |  |
|  |  | TTACCGAC | GTCGGTAA | CCACATTG |  |
|  |  | ACCGACAA | TTGTCGGT | CCACATTG |  |
|  |  | CAACGAGT | ACTCGTTG | CCACATTG |  |
|  |  | AGTATGCC | GGCATACT | CCACATTG |  |
|  |  | TCACCTAG | CTAGGTGA | CCACATTG |  |
|  |  | ATCGGAGA | TCTCCGAT | CCACATTG |  |
|  |  | CTGTACCA | TGGTACAG | CCACATTG |  |
|  |  | ACAACAGC | GCTGTTGT | CCACATTG |  |
|  |  | GACTTGTG | CACAAGTC | CCACATTG |  |
